# Supplementary material for: Multigroup analysis of compositions of microbiomes with covariate adjustments and repeated measures
Source: PubMed Central journal article supplement (PMC10776411; doi:10.1038/s41592-023-02092-7), 2023-12-29
Supplement: 41592_2023_2092_MOESM1_ESM.pdf [file 41592_2023_2092_MOESM1_ESM.pdf]

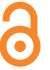

---

# Multigroup analysis of compositions of microbiomes with covariate adjustments and repeated measures

---

In the format provided by the authors and unedited

---

# Contents

|          |                                                                             |          |
|----------|-----------------------------------------------------------------------------|----------|
| <b>1</b> | <b>Supplementary Methods</b>                                                | <b>2</b> |
| 1.1      | Simulation Details . . . . .                                                | 2        |
| 1.2      | FDR Adjusted Power (FAP) . . . . .                                          | 5        |
| 1.3      | Computational Efficiency and Performance Benchmarking of Various DA Methods | 5        |
| <b>2</b> | <b>Supplementary Tables</b>                                                 | <b>6</b> |

# 1 Supplementary Methods

## 1.1 Simulation Details

The simulation studies conducted in this paper employed the Poisson lognormal (PLN) model to construct microbial absolute abundances, adhering to the methodology presented in the Linear Decomposition Model (LDM) [1]. The PLN model proposes that microbial abundance derives from a Poisson distribution, with the mean conforming to a multivariate log-normal distribution. This approach aligns the abundance vector with a Gaussian latent vector. The inclusion of a latent layer within the PLN model results in an elevated variance compared to a standard Poisson model, effectively capturing the over-dispersion traits inherent to microbiome data. Moreover, the covariance or correlation found among abundances mirrors the same covariance or correlation among the associated latent variables, with the underlying multivariate Gaussian distribution providing enhanced flexibility in the modeling of variance-covariance structures for microbial absolute abundances. For the construction of these simulations, we utilized a subset of the upper respiratory tract (URT) microbiome data, comprising 60 samples and 382 operational taxonomic units (OTUs), from an original dataset of 60 samples and 856 OTUs [2]. OTUs present in less than 5% of samples were excluded to refine the dataset. Rather than a manual specification of the mean vector and the variance-covariance matrix for absolute abundances, we employed estimates derived from the actual URT dataset, grounding our simulation parameters in real-world data. It is of critical importance to highlight that our methodology, ANCOM-BC2, was not derived from the PLN model; therefore, our simulation data does not intrinsically privilege our methodology in comparison to competing methods.

Informed by the observed shortcomings of ANCOM-BC from our practical application, we designed an exhaustive simulation study emphasizing scenarios that highlighted ANCOM-BC's limitations, aiming to evaluate the robustness of various DA methodologies. We incorporated two sources of bias into the synthetic data. We accounted for potential sequencing efficiency discrepancies by implementing a feature-specific bias for each taxon, which was randomly sampled from a uniform distribution ( $C \sim U[0.1, 1]$ ). In parallel, a sample-specific bias was introduced to ensure the presence of rare taxa (exhibiting over 50% zeros across samples), providing a robustness test for the DA methods in terms of pseudo-count addition. This bias was closely correlated with the exposure of interest, thereby examining the methods' performance in the face of batch effects — a frequent concern in large-scale omics studies. Additional information about the simulation design for batch effects can be found in Extended Data Fig. 1. We integrated the influences of both the exposure and adjusting covariates into the log absolute abundance data for a certain proportion of taxa—referred to as DA or non-null taxa. The log fold-changes for these variables, based on the natural logarithm, were drawn from  $[-2, -1, 1, 2]$ , representing a fold-change varying from 0.14 to 7.4 on the original scale. We also investigated the DA methods' robustness in relation to the violation of an assumption pervasive in many DA methodologies: the assumption that most taxa are not differentially abundant. We examined five cases in which the underlying true proportion of DA taxa varied from 5% to 90% ( $p = 5\%, 10\%, 20\%, 50\%$ , and  $90\%$ ). The selection of DA taxa was performed randomly. A broad span of sample sizes, or samples per group if the exposure is discrete, was examined:  $n = 10, 20, 30, 50, 100$ . For ANCOM-BC2, we employed a sensitivity analysis specific to the addition of pseudo-counts to zeros. Consequently, we introduced two variants of ANCOM-BC2: ANCOM-BC2 (No Filter) and ANCOM-BC2 (SS Filter). The former, ANCOM-BC2 (No Filter), is devised to identify significant taxa via the ANCOM-BC2 methodology, regardless of their performance in the sensitivity score filter. This includes taxa that display sensitivity to the inclusion of pseudo-counts.

Conversely, the ANCOM-BC2 (SS Filter) variant also utilizes the ANCOM-BC2 methodology for the identification of significant taxa, but it distinctly omits those that failed to meet the sensitivity score filter criteria. Here, a taxon would only be declared significant if it was significant without the addition of a pseudo-count (in line with the ANCOM-BC2 default setting) and if it remained significant across a range of pseudo-count additions. For the control of false discovery rates due to multiple testing, we favored the Holm-Bonferroni method [3] over the Benjamini-Hochberg (BH) procedure [4] for all DA methods. The Holm-Bonferroni method, independent of assumptions regarding the dependence structure among the underlying p-values, is recognized as more robust when dealing with inaccurate p-values [5]. In regard to data preprocessing, we have utilized a tailored protocol based on the DA methods employed. Specifically, for ANCOM-BC2, ANCOM-BC, LinDA, and LOCOM, a taxon filter was applied to exclude taxa displaying less than 10% prevalence across samples. Concurrently, samples with a library size (total counts across taxa) of less than or equal to 1000 counts were discarded from the study. In relation to the use of CORNCOB, a method specializing in differential relative abundance analysis, we also implemented an exclusionary criterion based on library size, specifically discarding any samples with counts of 1000 or less. It is important to note that the application of a taxon filter was not feasible within this method due to limitations inherent in its current implementation, which does not provide for this feature. In consideration of the computational efficiency of CORNCOB, the bootstrap function was disabled, and the Wald test statistic was employed. Beyond these specific modifications, the default parameters were retained in all DA methods unless otherwise stated, ensuring consistency in the analyses.

**Continuous exposure.** We generated a continuous exposure variable (*cont*) from a standard normal distribution ( $cont \sim N(0, 1)$ ) and introduced an adjusting binary covariate that equally divided the samples into two categories. The log fold-changes for the adjusting covariate, drawn from  $[0, 1]$ , were applied to a randomly chosen subset of taxa. Sample-specific bias (*S*), reflective of sampling fraction differences, was set to strongly correlate with the continuous exposure ( $S = \text{softmax}(cont)/10$ ) to simulate batch effects. The log-transformed sample-specific bias ( $s = \log S$ ) and feature-specific bias ( $c = \log C$ ) were applied to the log absolute abundances of samples and taxa, respectively. Each  $(n, p)$  combination was iterated 100 times, with a significance level of 0.05.

**Binary exposure.** In our simulation study concerning a binary exposure with a continuous adjusting covariate, we modified the settings used in the continuous exposure scenario. We evaluated a sequence of per-group sample sizes: 10, 20, 30, 50, and 100, resulting in total sample sizes for the binary exposure of 20, 40, 60, 100, and 200. To simulate batch effects, sample-specific bias (*S*) was strongly correlated with the binary exposure, set between  $1e - 4$  to  $1e - 3$  ( $S \sim U[1e - 4, 1e - 3]$ ) for the first half of samples and  $1e - 3$  to  $1e - 2$  ( $S \sim U[1e - 3, 1e - 2]$ ) for the second half. An adjusting continuous covariate was incorporated, with its log fold-changes drawn from  $[0, 1]$ , and applied to a randomly selected taxa subset with non-zero log fold-changes.

**Multiple pairwise comparisons (against a reference group).** In our simulation study involving multiple pairwise comparisons against the reference group, we used the sample settings from the binary exposure scenario but with a three-level categorical variable as the exposure of interest and a continuous variable as the adjusting covariate. The sample sizes per group ranged from 10 to 100, resulting in total sample sizes for the categorical exposure between 30 and 300. To simulate batch effects, the sample-specific bias (*S*) was strongly correlated with the categorical

exposure, with  $S$  values ranging from  $1e - 4$  to  $1e - 3$  ( $S \sim U[1e - 4, 1e - 3]$ ) for the first third of samples,  $1e - 3$  to  $1e - 2$  ( $S \sim U[1e - 3, 1e - 2]$ ) for the middle third, and  $1e - 2$  to  $1e - 1$  ( $S \sim U[1e - 2, 1e - 1]$ ) for the last third. The log fold-changes for DA (non-null) taxa in the second group compared to the reference group and in the third group compared to the reference group were randomly drawn from the range of  $[-2, -1, 1, 2]$ . The selection of DA taxa for the two comparisons was performed randomly and could differ between the comparisons.

**Multiple pairwise comparisons.** In our simulation of multiple pairwise comparisons, we utilized the sample settings from the multiple pairwise comparisons against the reference group scenario. However, we expanded the analysis to include comparisons between the second group and the third group. Specifically, the log fold-changes between the second group and the third group were calculated as the difference between the log fold-changes of "the second group compared to the reference group" and "the third group compared to the reference group".

**Pattern analysis.** In our simulation study for pattern analysis, we largely replicated the settings from the multiple pairwise comparisons study, with an exception made for the log fold-changes for the categorical exposure, tailored to benchmark a scenario featuring a monotonically increasing pattern. Here, the log fold-change between the second group and the reference group, denoted as  $\delta$ , was randomly drawn from the set  $[0.5, 1.0, 1.5, 2.0]$ , and the log fold-change for the third group was fixed at  $\delta + 1$  in relation to the reference group.

**Correlated samples.** In our simulation study, we contemplated two scenarios: one harboring solely a random intercept effect and another hosting both random intercept and random slope effects. Both random effects were characterized by a mean of zero, with standard deviations of 1 and 1.5 for the random intercept and random slope, respectively. If both random effects were present, they were associated with a correlation coefficient of 0.5. In these scenarios, the exposure variable contained three levels, thus defining three experimental groups. A continuous adjusting covariate was also incorporated. The remaining simulation settings were maintained as previously described in the preceding sections.

**Normalization and transformation used for different DA methods** We provide additional details regarding the preprocessing steps for each DA method discussed in our simulation studies. For ANCOM-BC2 and ANCOM-BC, no external normalization or transformation was applied to the input data. These methodologies internally estimate and correct biases, such as sample- and taxon-specific biases in ANCOM-BC2, and sample-specific bias in ANCOM-BC, prior to conducting statistical inferences. Therefore, these methods operate on internally "normalized" or "bias-corrected" absolute abundances. In the case of LinDA, it applies the centered Log-Ratio (CLR) transformation to the input data and incorporates an internal normalization procedure as part of its bias-correction process, akin to ANCOM-BC2 and ANCOM-BC. No further external transformation or normalization steps were performed for LinDA. LOCOM, on the other hand, accepts relative abundances (proportions) as input, which can be viewed as data already subjected to a "total-sum scaling" normalization. LOCOM infers changes in absolute abundance through a transformation similar to the Additive Log-Ratio (ALR) transformation. As such, LOCOM does not require any additional external transformation or normalization. CORN-COB, designed specifically for analyzing relative abundances, includes an internal "total-sum scaling" normalization procedure. No transformation is performed on the data for CORNCOB.

## 1.2 FDR Adjusted Power (FAP)

We introduced a novel concept, the "False Discovery Rate Adjusted Power (FAP)", defined as  $\ln \frac{\text{power}}{\text{FDR}}$ . Consequently, a method with a lower FDR and higher power would achieve a higher FAP value, indicative of a good power/FDR trade-off. The FAP was computed using power and FDR values derived from the simulation studies conducted for both continuous and binary exposure scenarios discussed in Fig. 1 of the main paper. It should be noted that the FAP is an average of over 100 simulation runs at each setting. Note that methods with very low power but equally low FDR may also yield a high FAP. Hence, the selection of a method should not rely solely on a high FAP value, but the user should make FAP comparisons with a minimum power requirement, such as 0.6 or 0.8, etc.

## 1.3 Computational Efficiency and Performance Benchmarking of Various DA Methods

We evaluated the computational efficiency of the methods described in this paper using the "atlas1006" data [6]. Our focus was limited to comparing the "lean" and "obese" subjects since not all methods are tailored for multi-group hypothesis testing. Also, since not all methods considered in this paper are suitable for repeated measurements, we confined our comparisons to only baseline data. This resulted in 130 genera across 630 samples. The CPU time for implementing each method is summarized as follows: LOCOM and CORNCOB were computationally most intensive, requiring close to a minute each (62.3 seconds and 59.34 seconds, respectively), whereas ANCOM-BC2 (SS Filter) was faster than these two methods clocking in at 29.47 seconds. ANCOM-BC2 (No Filter) required only 8.58 seconds and ANCOM-BC took 6.02 seconds. Although LinDA was the fastest algorithm, taking only 0.05 seconds, it may not be preferable due to potentially high FDR as reported in simulation studies. Relative to the amount of time taken to conduct microbiome studies and generate data, the CPU time taken by the above DA methods is trivial. Hence when choosing a DA analysis method, characteristics such as FDR control and power should outweigh the CPU time taken by a method.

## 2 Supplementary Tables

Supplementary Table 1: Presence/Absence Test on the Soil Microbiome Data

| <b>Genus</b>       | <b>Arid</b> | <b>Margin</b> | <b>Hyperarid</b> |
|--------------------|-------------|---------------|------------------|
| 4W                 | Presence    | Absence       | Absence          |
| A17                | Presence    | Presence      | Absence          |
| Acanthamoeba       | Presence    | Presence      | Absence          |
| Acidisoma          | Presence    | Absence       | Absence          |
| Acidisphaera       | Presence    | Absence       | Absence          |
| Acidocella         | Absence     | Presence      | Absence          |
| Acidovorax         | Presence    | Absence       | Absence          |
| Actinoallomurus    | Presence    | Absence       | Absence          |
| Actinocorallia     | Presence    | Absence       | Absence          |
| Actinomyces        | Absence     | Presence      | Absence          |
| Actinomycetospora  | Presence    | Presence      | Absence          |
| Actinophytocola    | Presence    | Presence      | Absence          |
| Actinoplanes       | Presence    | Presence      | Absence          |
| Actinopolymorpha   | Presence    | Presence      | Absence          |
| Aeromicrobium      | Presence    | Absence       | Absence          |
| Aetherobacter      | Presence    | Absence       | Absence          |
| Afipia             | Presence    | Absence       | Absence          |
| Agromyces          | Presence    | Absence       | Absence          |
| Alkaliflexus       | Presence    | Absence       | Absence          |
| Altererythrobacter | Presence    | Absence       | Absence          |
| Aminobacter        | Presence    | Absence       | Absence          |
| Amorphomonas       | Absence     | Presence      | Absence          |
| Anaeromyxobacter   | Presence    | Presence      | Absence          |
| Ancylobacter       | Presence    | Absence       | Absence          |
| Aquicella          | Presence    | Presence      | Absence          |
| Aquincola          | Presence    | Absence       | Absence          |
| Ardenscatena       | Absence     | Presence      | Absence          |
| Arthrobacter       | Presence    | Presence      | Absence          |
| Arthrospira        | Presence    | Absence       | Absence          |
| Asteroleplasma     | Presence    | Absence       | Absence          |
| Azoarcus           | Presence    | Absence       | Absence          |
| Azohydromonas      | Presence    | Absence       | Absence          |
| Azospirillum       | Absence     | Presence      | Absence          |
| Bacillus           | Presence    | Absence       | Absence          |
| Balneimonas        | Presence    | Presence      | Absence          |
| Beijerinckia       | Presence    | Absence       | Absence          |
| Belnapia           | Presence    | Absence       | Absence          |
| Bifidobacterium    | Presence    | Absence       | Absence          |
| Blautia            | Absence     | Presence      | Absence          |
| Bosea              | Presence    | Absence       | Absence          |
| Buchnera           | Absence     | Presence      | Absence          |

Continued on next page

**Supplementary Table 1 – continued from previous page**

| <b>Genus</b>                 | <b>Arid</b> | <b>Margin</b> | <b>Hyperarid</b> |
|------------------------------|-------------|---------------|------------------|
| Byssovorax                   | Presence    | Absence       | Absence          |
| Caldilinea                   | Presence    | Absence       | Absence          |
| Caldimonas                   | Absence     | Presence      | Absence          |
| Caloramator                  | Absence     | Presence      | Absence          |
| Candidatus Amoebophilus      | Presence    | Absence       | Absence          |
| Candidatus Entotheonella     | Presence    | Presence      | Absence          |
| Candidatus Koribacter        | Presence    | Presence      | Absence          |
| Candidatus Protochlamydia    | Presence    | Absence       | Absence          |
| Candidatus Rhabdochlamydia   | Presence    | Absence       | Absence          |
| Candidatus Solibacter        | Presence    | Presence      | Absence          |
| Candidatus Xiphinematobacter | Presence    | Absence       | Absence          |
| Carboxydotherrmus            | Absence     | Presence      | Absence          |
| Cardiobacterium              | Presence    | Absence       | Absence          |
| Catellatospora               | Presence    | Presence      | Absence          |
| Catenuloplanes               | Presence    | Absence       | Absence          |
| Caulobacter                  | Presence    | Absence       | Absence          |
| Cellulomonas                 | Presence    | Presence      | Absence          |
| Cesiribacter                 | Presence    | Absence       | Absence          |
| Chelativorans                | Presence    | Presence      | Absence          |
| Chelatococcus                | Absence     | Presence      | Absence          |
| Chitinophaga                 | Presence    | Presence      | Absence          |
| Chroococcidiopsis            | Presence    | Absence       | Absence          |
| Chthoniobacter               | Presence    | Presence      | Absence          |
| Chthonomonas                 | Presence    | Absence       | Absence          |
| Clavisporangium              | Presence    | Absence       | Absence          |
| Cohnella                     | Presence    | Presence      | Absence          |
| Collimonas                   | Presence    | Absence       | Absence          |
| Conexibacter                 | Presence    | Presence      | Absence          |
| Coxiella                     | Presence    | Absence       | Absence          |
| Crocinitomix                 | Presence    | Absence       | Absence          |
| Cryocola                     | Presence    | Absence       | Absence          |
| Cupriavidus                  | Presence    | Absence       | Absence          |
| Cytophaga                    | Presence    | Absence       | Absence          |
| Dactylosporangium            | Presence    | Presence      | Absence          |
| Desmospora                   | Presence    | Absence       | Absence          |
| Devosia                      | Presence    | Presence      | Absence          |
| Dokdonella                   | Presence    | Absence       | Absence          |
| Dongia                       | Presence    | Absence       | Absence          |
| Dyadobacter                  | Presence    | Absence       | Absence          |
| Dyella                       | Presence    | Absence       | Absence          |
| Edaphobacter                 | Presence    | Absence       | Absence          |
| Ellin506                     | Presence    | Absence       | Absence          |
| Enhydrobacter                | Presence    | Absence       | Absence          |
| Enterobacter                 | Presence    | Absence       | Absence          |
| Enterococcus                 | Absence     | Presence      | Absence          |

Continued on next page



**Supplementary Table 1 – continued from previous page**

| <b>Genus</b>        | <b>Arid</b> | <b>Margin</b> | <b>Hyperarid</b> |
|---------------------|-------------|---------------|------------------|
| Erythrobacter       | Presence    | Absence       | Absence          |
| Estrella            | Presence    | Absence       | Absence          |
| FFCH4570            | Presence    | Presence      | Absence          |
| Filimonas           | Presence    | Absence       | Absence          |
| Fimbriimonas        | Presence    | Absence       | Absence          |
| Flavobacterium      | Presence    | Absence       | Absence          |
| Fluviicola          | Presence    | Presence      | Absence          |
| Fodinicola          | Presence    | Absence       | Absence          |
| Frigoribacterium    | Absence     | Presence      | Absence          |
| Fulvivirga          | Presence    | Absence       | Absence          |
| Gaiella             | Presence    | Absence       | Absence          |
| Georgenia           | Absence     | Presence      | Absence          |
| Glycomyces          | Presence    | Presence      | Absence          |
| Haliangium          | Presence    | Absence       | Absence          |
| Herminiiimonas      | Presence    | Absence       | Absence          |
| heteroC45           | Presence    | Absence       | Absence          |
| Hymenobacter        | Presence    | Absence       | Absence          |
| Hyphomicrobium      | Presence    | Presence      | Absence          |
| Iamia               | Presence    | Presence      | Absence          |
| Inquilinus          | Presence    | Presence      | Absence          |
| Janthinobacterium   | Presence    | Presence      | Absence          |
| JG37-AG-70          | Presence    | Presence      | Absence          |
| Kaistia             | Presence    | Absence       | Absence          |
| Kaistibacter        | Presence    | Absence       | Absence          |
| Kibdelosporangium   | Presence    | Presence      | Absence          |
| Kitasatospora       | Presence    | Absence       | Absence          |
| Kribbella           | Presence    | Presence      | Absence          |
| Kutzneria           | Presence    | Absence       | Absence          |
| Kyrpidia            | Presence    | Absence       | Absence          |
| Labrys              | Presence    | Absence       | Absence          |
| Laceyella           | Presence    | Absence       | Absence          |
| Lachnoanaerobaculum | Presence    | Absence       | Absence          |
| Larkinella          | Presence    | Absence       | Absence          |
| Legionella          | Presence    | Absence       | Absence          |
| Leminorella         | Absence     | Presence      | Absence          |
| Lentzea             | Presence    | Absence       | Absence          |
| Limnobacter         | Presence    | Absence       | Absence          |
| Listeria            | Presence    | Absence       | Absence          |
| Loktanella          | Presence    | Presence      | Absence          |
| Longispora          | Presence    | Absence       | Absence          |
| Luteibacter         | Presence    | Absence       | Absence          |
| Luteimonas          | Presence    | Absence       | Absence          |
| Luteolibacter       | Presence    | Absence       | Absence          |
| Lutibacterium       | Absence     | Presence      | Absence          |
| Lysobacter          | Presence    | Absence       | Absence          |

Continued on next page

**Supplementary Table 1 – continued from previous page**

| <b>Genus</b>     | <b>Arid</b> | <b>Margin</b> | <b>Hyperarid</b> |
|------------------|-------------|---------------|------------------|
| Magnetospirillum | Presence    | Presence      | Absence          |
| Maribacter       | Presence    | Absence       | Absence          |
| Marina           | Presence    | Absence       | Absence          |
| Marmoricola      | Presence    | Presence      | Absence          |
| Megamonas        | Absence     | Presence      | Absence          |
| Methylibium      | Presence    | Presence      | Absence          |
| Methylobacillus  | Presence    | Absence       | Absence          |
| Methylobacterium | Presence    | Absence       | Absence          |
| Methylotenera    | Presence    | Absence       | Absence          |
| Microbispora     | Presence    | Absence       | Absence          |
| Microbispora     | Presence    | Presence      | Absence          |
| Micrococcus      | Absence     | Presence      | Absence          |
| Microlunatus     | Presence    | Absence       | Absence          |
| Micromonospora   | Presence    | Presence      | Absence          |
| Moryella         | Absence     | Presence      | Absence          |
| Mucilaginibacter | Presence    | Absence       | Absence          |
| Mycobacterium    | Presence    | Presence      | Absence          |
| Mycoplana        | Presence    | Absence       | Absence          |
| Myxococcus       | Presence    | Absence       | Absence          |
| Nannocystis      | Presence    | Presence      | Absence          |
| Neochlamydia     | Presence    | Absence       | Absence          |
| Niabella         | Presence    | Absence       | Absence          |
| Niastella        | Presence    | Absence       | Absence          |
| Nitrobacter      | Presence    | Absence       | Absence          |
| Nitrosovibrio    | Presence    | Presence      | Absence          |
| Nocardia         | Presence    | Absence       | Absence          |
| Nocardioides     | Presence    | Presence      | Absence          |
| Nonomuraea       | Presence    | Presence      | Absence          |
| Nostocoida       | Presence    | Absence       | Absence          |
| Oceanobacillus   | Presence    | Absence       | Absence          |
| Olivibacter      | Presence    | Absence       | Absence          |
| Olsenella        | Presence    | Absence       | Absence          |
| Opitutus         | Presence    | Presence      | Absence          |
| OR-59            | Presence    | Absence       | Absence          |
| Oryzihumus       | Presence    | Absence       | Absence          |
| Oscillochloris   | Presence    | Absence       | Absence          |
| Oxalobacter      | Presence    | Absence       | Absence          |
| Parabacteroides  | Presence    | Absence       | Absence          |
| Parachlamydia    | Presence    | Absence       | Absence          |
| Paracraurococcus | Presence    | Presence      | Absence          |
| Parasegitibacter | Presence    | Absence       | Absence          |
| Pasteuria        | Presence    | Absence       | Absence          |
| Patulibacter     | Presence    | Absence       | Absence          |
| Paucibacter      | Presence    | Absence       | Absence          |
| Pedobacter       | Presence    | Presence      | Absence          |

Continued on next page

**Supplementary Table 1 – continued from previous page**

| <b>Genus</b>      | <b>Arid</b> | <b>Margin</b> | <b>Hyperarid</b> |
|-------------------|-------------|---------------|------------------|
| Pedomicrobium     | Presence    | Presence      | Absence          |
| Pedosphaera       | Presence    | Presence      | Absence          |
| Peredibacter      | Presence    | Absence       | Absence          |
| Phaeospirillum    | Presence    | Absence       | Absence          |
| Phaselicystis     | Presence    | Absence       | Absence          |
| Phenylobacterium  | Presence    | Presence      | Absence          |
| Phycococcus       | Presence    | Absence       | Absence          |
| Phyllobacterium   | Presence    | Absence       | Absence          |
| Phytohabitans     | Presence    | Presence      | Absence          |
| Pilimelia         | Presence    | Absence       | Absence          |
| Pimelobacter      | Presence    | Presence      | Absence          |
| Pirellula         | Presence    | Presence      | Absence          |
| planctomycete     | Presence    | Absence       | Absence          |
| Pleomorphomonas   | Presence    | Presence      | Absence          |
| Plesiocystis      | Presence    | Absence       | Absence          |
| Polaromonas       | Presence    | Absence       | Absence          |
| Porphyrobacter    | Presence    | Absence       | Absence          |
| Procabacter       | Presence    | Absence       | Absence          |
| Promicromonospora | Presence    | Absence       | Absence          |
| Prostheco bacter  | Presence    | Absence       | Absence          |
| Pseudoxanthomonas | Presence    | Absence       | Absence          |
| Pythium           | Presence    | Absence       | Absence          |
| Quadrisphaera     | Presence    | Absence       | Absence          |
| Ramlibacter       | Presence    | Absence       | Absence          |
| Reyranella        | Presence    | Presence      | Absence          |
| Rhizobium         | Presence    | Absence       | Absence          |
| Rhodobium         | Absence     | Presence      | Absence          |
| Rhodococcus       | Presence    | Absence       | Absence          |
| Rhodocytophaga    | Presence    | Presence      | Absence          |
| Rhodoferax        | Presence    | Absence       | Absence          |
| Rhodopila         | Presence    | Absence       | Absence          |
| Rickettsia        | Presence    | Absence       | Absence          |
| Roseomonas        | Presence    | Presence      | Absence          |
| Rothia            | Absence     | Presence      | Absence          |
| Rubellimicrobium  | Presence    | Presence      | Absence          |
| Rubricoccus       | Presence    | Absence       | Absence          |
| Rubritalea        | Presence    | Absence       | Absence          |
| Rubrivivax        | Presence    | Presence      | Absence          |
| Rugosimonospora   | Presence    | Absence       | Absence          |
| Saccharopolyspora | Presence    | Absence       | Absence          |
| Saccharothrix     | Presence    | Presence      | Absence          |
| Salinarimonas     | Presence    | Presence      | Absence          |
| Salinibacterium   | Presence    | Absence       | Absence          |
| Sciscionella      | Presence    | Absence       | Absence          |
| Serratia          | Absence     | Presence      | Absence          |

Continued on next page

**Supplementary Table 1 – continued from previous page**

| <b>Genus</b>       | <b>Arid</b> | <b>Margin</b> | <b>Hyperarid</b> |
|--------------------|-------------|---------------|------------------|
| Shewanella         | Absence     | Presence      | Absence          |
| Shigella           | Presence    | Absence       | Absence          |
| Shimazuella        | Presence    | Absence       | Absence          |
| Singulisphaera     | Presence    | Absence       | Absence          |
| Sinomonas          | Absence     | Presence      | Absence          |
| Sinorhizobium      | Presence    | Presence      | Absence          |
| Skermanella        | Presence    | Presence      | Absence          |
| Solimonas          | Presence    | Absence       | Absence          |
| Solwaraspora       | Presence    | Presence      | Absence          |
| Sorangium          | Presence    | Absence       | Absence          |
| Sphaerisporangium  | Presence    | Presence      | Absence          |
| Sphingopyxis       | Presence    | Absence       | Absence          |
| Sphingosinicella   | Presence    | Absence       | Absence          |
| Spirillospora      | Presence    | Absence       | Absence          |
| Sporichthya        | Presence    | Presence      | Absence          |
| Sporocytophaga     | Presence    | Presence      | Absence          |
| Sporolactobacillus | Presence    | Absence       | Absence          |
| Sporosarcina       | Presence    | Absence       | Absence          |
| Steroidobacter     | Presence    | Presence      | Absence          |
| Streptosporangium  | Presence    | Absence       | Absence          |
| Sulfitobacter      | Presence    | Presence      | Absence          |
| Tatlockia          | Presence    | Absence       | Absence          |
| Terracoccus        | Presence    | Absence       | Absence          |
| Thermacetogenium   | Absence     | Presence      | Absence          |
| Thermobispora      | Presence    | Absence       | Absence          |
| Thermocrispum      | Presence    | Absence       | Absence          |
| Thermomonas        | Presence    | Absence       | Absence          |
| Thermus            | Presence    | Presence      | Absence          |
| Thioalkalivibrio   | Presence    | Absence       | Absence          |
| Trachelomonas      | Presence    | Absence       | Absence          |
| Turcibacter        | Presence    | Absence       | Absence          |
| Uliginosibacterium | Presence    | Absence       | Absence          |
| Umezawaea          | Presence    | Absence       | Absence          |
| Variovorax         | Presence    | Presence      | Absence          |
| Verrucomicrobium   | Presence    | Absence       | Absence          |
| Virgisporangium    | Presence    | Presence      | Absence          |
| Woodsholea         | Presence    | Absence       | Absence          |
| Xylanimicrobium    | Absence     | Presence      | Absence          |
| Yonghaparkia       | Presence    | Absence       | Absence          |

## References

- [1] Yi-Juan Hu and Glen A Satten. Testing hypotheses about the microbiome using the linear decomposition model (ldm). *Bioinformatics*, 36(14):4106–4115, 2020.
- [2] Emily S Charlson, Jun Chen, Rebecca Custers-Allen, Kyle Bittinger, Hongzhe Li, Rohini Sinha, Jennifer Hwang, Frederic D Bushman, and Ronald G Collman. Disordered microbial communities in the upper respiratory tract of cigarette smokers. *PloS one*, 5(12):e15216, 2010.
- [3] Sture Holm. A simple sequentially rejective multiple test procedure. *Scandinavian journal of statistics*, pages 65–70, 1979.
- [4] Yoav Benjamini and Yosef Hochberg. Controlling the false discovery rate: a practical and powerful approach to multiple testing. *Journal of the Royal statistical society: series B (Methodological)*, 57(1):289–300, 1995.
- [5] Changwon Lim, Pranab K Sen, and Shyamal D Peddada. Robust analysis of high throughput screening (hts) assay data. *Technometrics*, 55(2):150–160, 2013.
- [6] Leo Lahti, Jarkko Salojärvi, Anne Salonen, Marten Scheffer, and Willem M De Vos. Tipping elements in the human intestinal ecosystem. *Nature communications*, 5(1):4344, 2014.
